# Supplementary material for: Electrical and mechanical properties of self-supported hydroxypropyl methylcellulose–polyaniline conducting films
Source: Royal Society of Chemistry journal article supplement (doi:10.1039/d3ra00916e), 2023-01-01
Supplement: d3ra00916e1.pdf [file d3ra00916e1.pdf]

## Supplementary Information

### ELECTRICAL AND MECHANICAL PROPERTIES OF SELF-SUPPORTED HYDROXYPROPYL METHYLCELLULOSE-POLYANILINE CONDUCTING FILMS

**Vinicius Cavalheiro Maeda<sup>a</sup>, Cintia Marques Correa<sup>a</sup>, Marcos Henrique Mamoru  
Otsuka Hamanaka<sup>b</sup>, Viviane Nogueira Hamanaka<sup>b</sup>, Celso Molina<sup>a</sup> and Fernanda  
F. Camilo<sup>a\*</sup>**

**<sup>a</sup>Department of Chemistry, Federal University of São Paulo, Rua São Nicolau, 210  
– Laboratório de Materiais Híbridos, CEP: 09913-030, Diadema, SP, Brazil**

**<sup>b</sup>Autocoat Equipamentos e Processos de Deposição LTDA, Rua Daniel Hogan, 434  
- sala 25 - Cidade Universitária, CEP 13083-836, Campinas, SP, Brazil**

*Corresponding author:* Fernanda Ferraz Camilo

Laboratório de Materiais Híbridos, Instituto de Ciências Ambientais, Químicas e  
Farmacêuticas, Universidade Federal de São Paulo

Rua São Nicolau, 210, CEP: 09913-030, Diadema – SP, Brazil

Phone: +55 11 3319-3568

E-mail: [ffcamilo@unifesp.br](mailto:ffcamilo@unifesp.br)

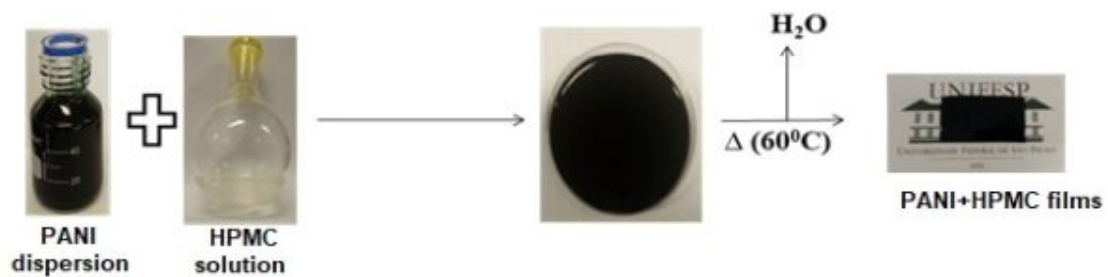

Figure 1S: Artwork representing the preparation of PANI\_HPMC films

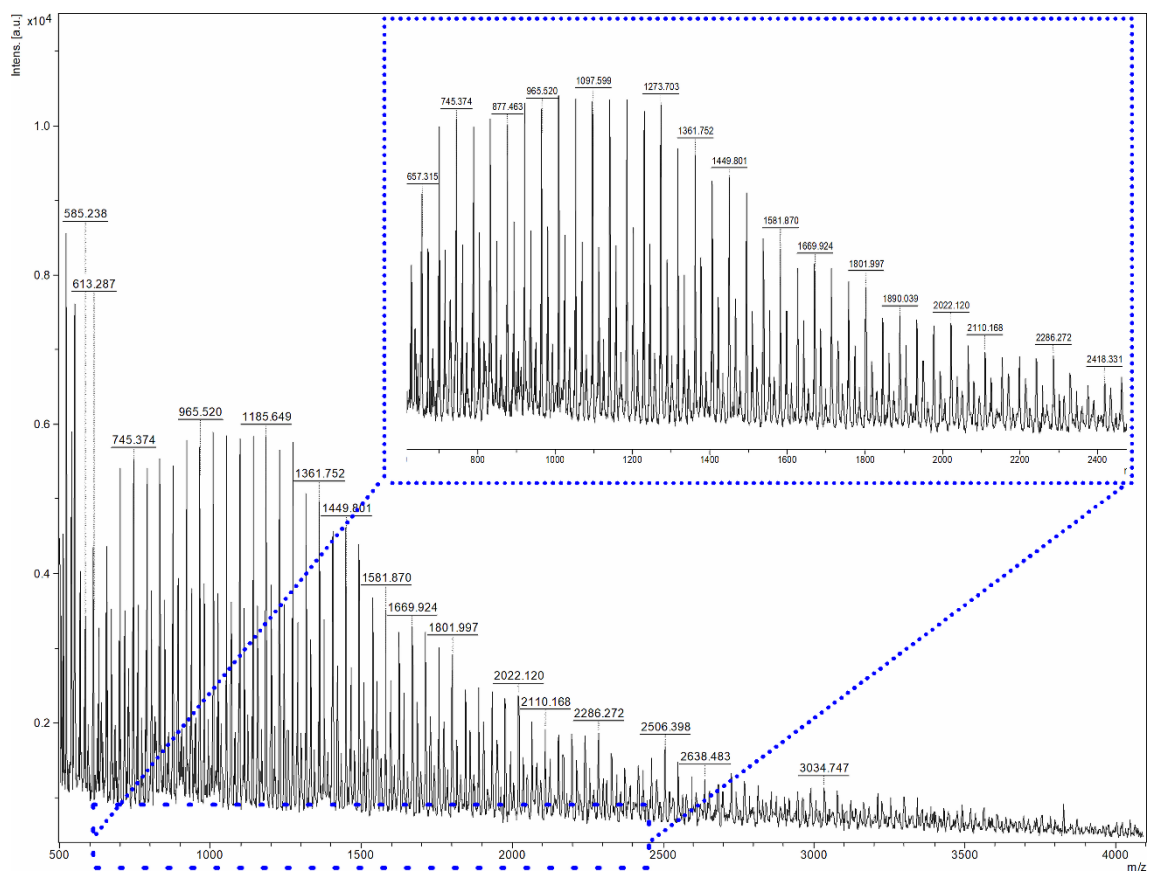

**Figure 2S: MADI-TOF analysis of PANI dispersion (The inset shows an expanded region. The peak at  $m/z = 2418.331$  corresponds to the 26-mer  $(26 * 93)$ )**

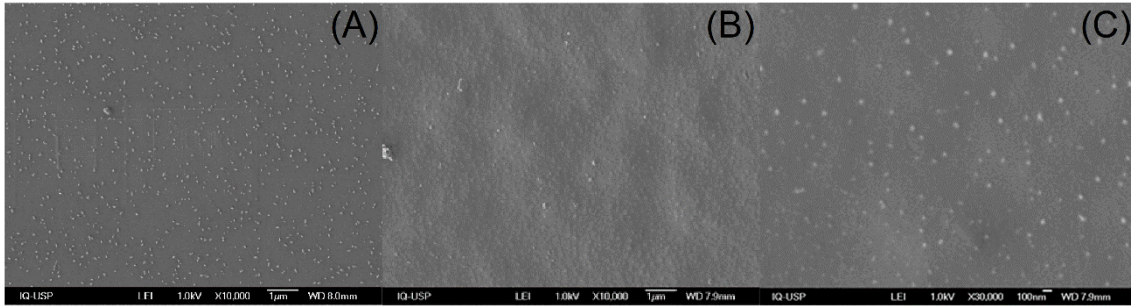

**Figure 3S: SEM images of HPMC (A), PANI (B) and PANI\_40%HPMC (C)**

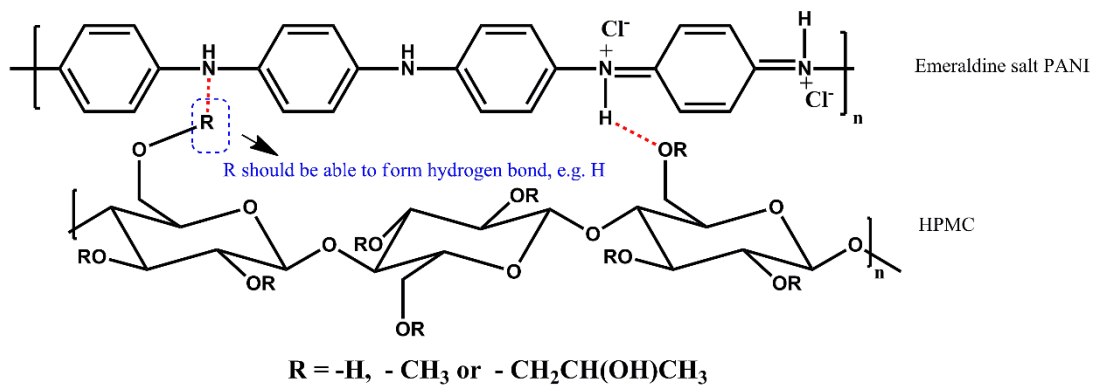

**Figure 4S: Proposed chemical interaction between PANI (emeraldine salt form) and HPMC**

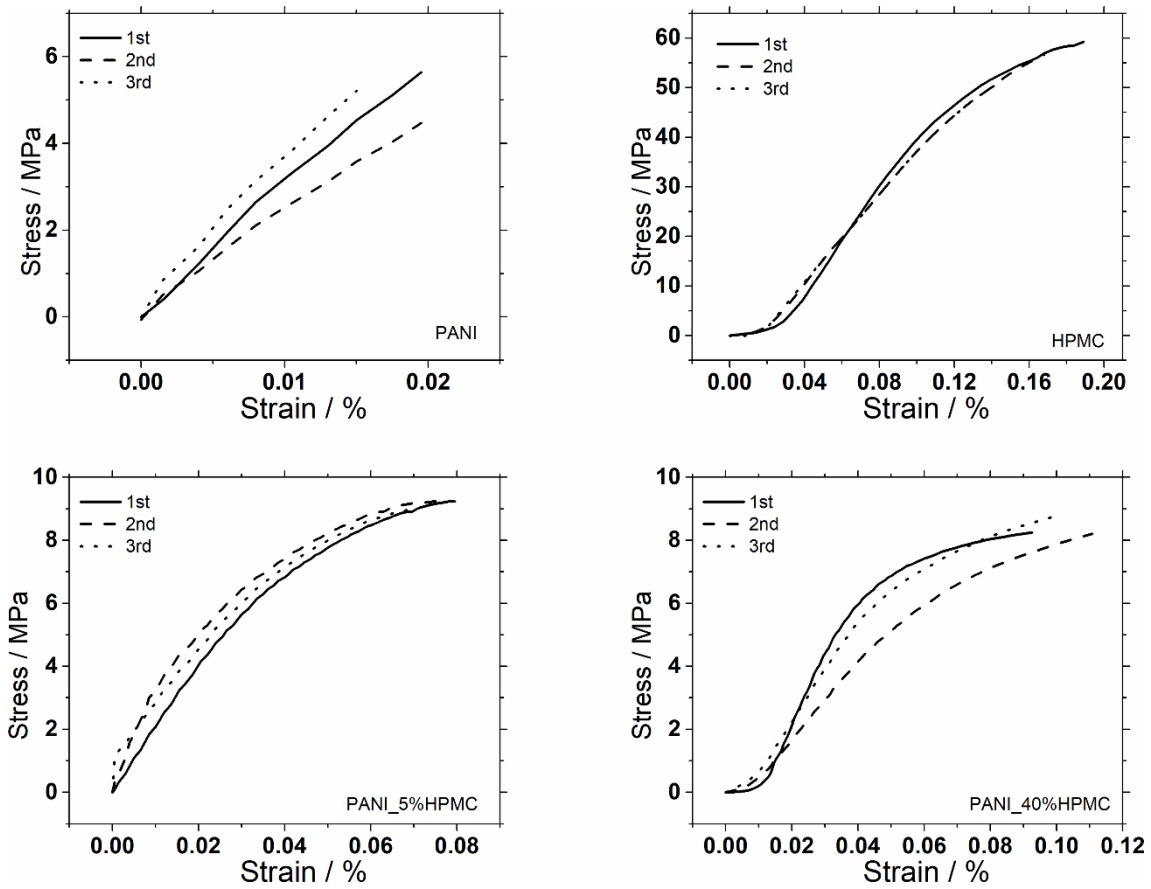

**Figure 5S: Stress-strain curves of the samples**

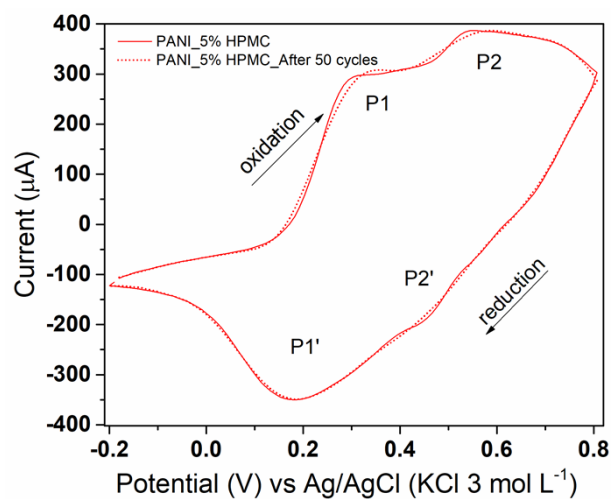

**Figure 6S: Cyclic voltammograms of PANI\_5%HPMC after 50 cycles. Scan rate 100 mV s<sup>-1</sup> in 1.0 M HCl aqueous solution.**

## Note 1

### Chemical equation of polymerization of aniline by ammonium persulfate

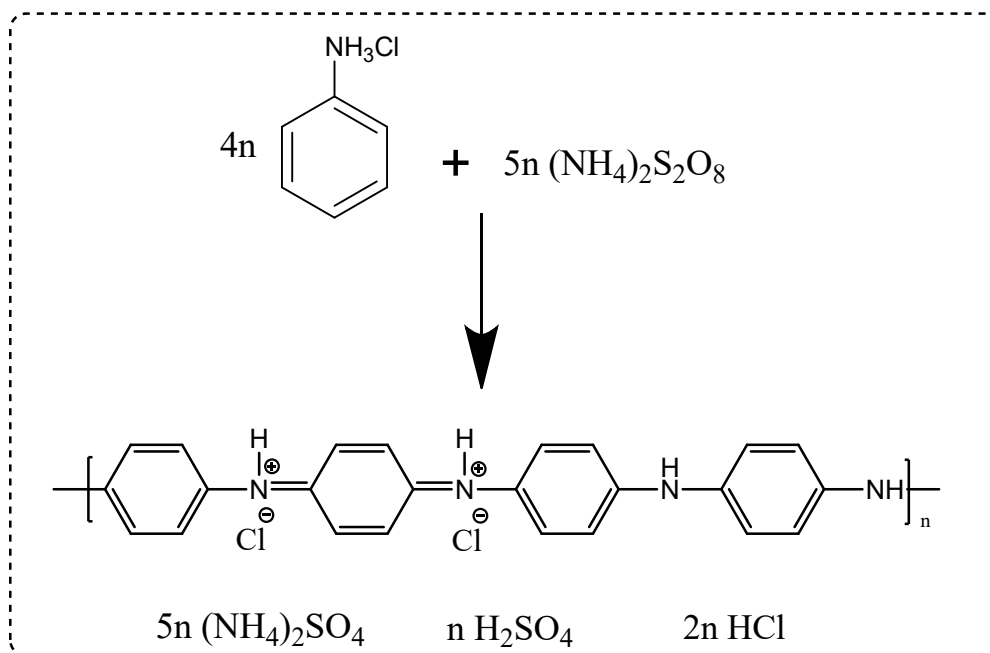

**Table 1S: Amounts of reagents**

|                                        | Aniline | $(\text{NH}_4)_2\text{S}_2\text{O}_8$ | PANI/ doped with 2 Cl <sup>-</sup> | PVP* |
|----------------------------------------|---------|---------------------------------------|------------------------------------|------|
| <b>molar mass (g mol<sup>-1</sup>)</b> | 93      | 228                                   | 435                                | --   |
| <b>Initial number of mol (mmol)</b>    | 20      | 25                                    | ----                               | ---- |
| <b>Final number of mol (mmol)</b>      | ----    | ----                                  | 5.0                                | ---- |
| <b>Final mass (g)</b>                  | ----    | ----                                  | 2.18                               | 2.00 |

*\*it was added 50 mg of an aqueous solution of PVP (40 g L<sup>-1</sup>)*

- ✓ Considering the stoichiometry of the reaction and the complete conversion (100 % yield), the total mass of the dispersion would be 4.18 g (2.18 g (PANI/2Cl<sup>-</sup>) + 2.00 g (PVP))
- ✓ Therefore, the PANI dispersion has 52 wt % of PANI and 48 wt% of PVP.
